# Supplementary material for: Electrochemiluminescence immunoassay strategies based on a hexagonal Ru-MOF and MoS2@GO nanosheets: detection of 5-fluorouracil in serum samples
Source: Royal Society of Chemistry journal article supplement (doi:10.1039/d3an00190c), 2023-01-01
Supplement: d3an00190c1.pdf [file d3an00190c1.pdf]

## Supplementary Material

### **Electrochemiluminescence immunoassay strategies based on hexagonal Ru-MOF and MoS<sub>2</sub>@GO nanosheets: Detection of 5-fluorouracil in serum samples**

Guoyu Ma<sup>a,&</sup>, Lu Peng<sup>a,&</sup>, SunXiaoYi Zhang<sup>a</sup>, Kang Wu<sup>b,\*</sup>, Anping Deng<sup>a,\*</sup>, Jianguo Li<sup>a,\*</sup>

<sup>a</sup> The Key Lab of Health Chemistry & Molecular Diagnosis of Suzhou, College of Chemistry, Chemical Engineering & Materials Science, Soochow University, Suzhou 215123, P.R. China

<sup>b</sup> School of Biology & Basic Medical Science, Soochow University, Suzhou 215123, P.R. China

---

& Guoyu Ma and Lu Peng contributes equally to this work.

\* Corresponding Authors: J.G. Li, Phone: +86 51265882195, Fax: +86 51265882195, E-mail: lijgsd@suda.edu.cn; A.P. Deng, Phone: +86 51265882362, Fax: +86 51265882362, E-mail: denganping@suda.edu.cn; K. Wu, Phone: +86 51265880178, Fax: +86 51265880178, E-mail: wukang650202@163.com.

## Reagents and Apparatus

Polyvinyl pyrrolidone (PVP,  $M_w = 40000$ ) was purchased from Sigma-Aldrich Co., Ltd (C). Zinc nitrate hexahydrate ( $Zn(NO_3)_2 \cdot 6H_2O$ , 99%) was bought from Sinopharm Chemical Reagent Co., Ltd. sulfuric acid ( $H_2SO_4$ , 95%~98%) was obtained from Chinasun Specialty Products Co.,Ltd. Pyrazine ( $C_4H_4N_4$ , 99%) was purchased from Macklin (Shanghai) Co., Ltd. Thiourea ( $CH_4N_2$ , 99%) was bought from Tokyo Chemical Industry. Potassium peroxodisulfate ( $K_2S_2O_8$ , 99%) was obtained from Sinopharm Chemical Reagent Co., Ltd. Tris(4,4'-dicarboxylicacid-2,2'-bipyridyl)ruthenium(II) dichloride( $Ru(dcbpy)_3^{2+}$ ), 98%) was purchased from Shanghai yuanye Bio-Technology Co., Ltd. Ethyl-3-(dimethyl aminopropyl) carbodiimide (EDC, 98%) and N-hydroxysuccinimide (NHS, 97%) were bought from J&K Scientific (Beijing, China). Graphite powder was purchased from Sinopharm Chemical Reagent Co., Ltd. Phosphorus pentoxide( $P_2O_5$ , 98%) was bought from Sinopharm Chemical Reagent Co., Ltd. Hexaammonium Molybdate ( $(NH_4)_6Mo_7O_{24}$ , 98%) was purchased Shanghai Adamas Reagent Co., Ltd. Potassium permanganate( $KMnO_4$ , 99.5%) was obtained from Sinopharm Chemical Reagent Co., Ltd. 5-FU coating antigen and 5-FU antibody were obtained from our group. Bovine serum albumin (BSA) was acquired from Sigma-Aldrich Co., Ltd (Shanghai). All other reagents and materials were commercially available and of analytical reagent grade.

The ECL emission was measured by an MPI-A ECL analytical system (Xi'An Remex Electronic Science & Technology Co., Ltd, Xi'An, China) in ECL buffer solution. The potential scan was from -1.6 V to 0 V with the voltage of the photomultiplier tube (PMT) set at 700 V. A three-electrode system was used in the experiment, including the modified glassy carbon electrode as working electrode (GCE,  $\Phi = 3$  mm), a platinum wire counter electrode and an Ag/AgCl reference electrode

(saturated KCl solution). The Scanning Electronic Microscopy (SEM) was supplied by Hitachi SU8010 SEM (Hitachi Co., Japan). The Transmission Electron Microscope (TEM) images were obtained from Tecnai G2 F20 S-TWIN 200KV (FEG, FEI Co., USA). UV-vis absorption spectrum was recorded with Agilent 8453 UV-vis spectrophotometer (Agilent Co., America). EIS was undertaken using an RST electrochemical workstation (Suzhou Risetest Instrument Co., Ltd, Suzhou, China). ECL emission spectrum of Ru-MOF was carried out with the RFAS-1 automatic electrochemiluminescence spectrophotometer (Xi'An Remex Electronic Science & Technology Co., Ltd, Xi'An, China), using the same three-electrode system as that in the ECL detection.

### **Buffer solution**

Phosphate-buffered saline stock solution (PBS, 0.1 mol L<sup>-1</sup>) was prepared by KCl (0.1 mol L<sup>-1</sup>), NaCl (0.1 mol L<sup>-1</sup>), Na<sub>2</sub>HPO<sub>4</sub> (6.4 mmol L<sup>-1</sup>) and KH<sub>2</sub>PO<sub>4</sub> (1.0 mmol L<sup>-1</sup>). K<sub>2</sub>S<sub>2</sub>O<sub>8</sub> solution (0.1 mol L<sup>-1</sup>) was used as ECL detection buffer solution. Fe(CN)<sub>6</sub><sup>3-</sup>/Fe(CN)<sub>6</sub><sup>4-</sup> standard solution containing KCl (0.1 mol L<sup>-1</sup>), Fe(CN)<sub>6</sub><sup>3-</sup> (5 mmol L<sup>-1</sup>) and Fe(CN)<sub>6</sub><sup>4-</sup> (5 mmol L<sup>-1</sup>) was employed to measure electrochemical impedance spectroscopy (EIS).

**Table S1****Table S1.** Properties of comparable methods for determination of 5-FU

| Methods      | LODs<br>(ng mL <sup>-1</sup> ) | Analytical ranges<br>(ng mL <sup>-1</sup> ) | References |
|--------------|--------------------------------|---------------------------------------------|------------|
| HPLC         | 2.0                            | 5~500                                       | 1          |
| GC-MS        | 0.167                          | 0.5~50                                      | 2          |
| GC-MS/MS     | 40                             | 0.09~4                                      | 3          |
| EC Sensor    | 34.7                           | 104~6×10 <sup>5</sup>                       | 4          |
| Fluorescence | 6.8                            | 1.32~1320                                   | 5          |
| ECLIA        | 3.1×10 <sup>-5</sup>           | 0.0001~100                                  | This work  |

**Table S2****Table S2** Selectivity of the ECL immunosensor to 11 interfering substances

| Interferences                    | Cross-interference rate (%) |
|----------------------------------|-----------------------------|
| 5-fluorouracil                   | 100                         |
| Carmofur                         | 5.1                         |
| 5-fluoro-2'-deoxyuridine         | 9.9                         |
| Gimeracil                        | < 0.10                      |
| Capecitabine                     | < 0.10                      |
| 5-bromouracil                    | < 0.10                      |
| Uridine                          | < 0.10                      |
| 5-Bromo-2'-deoxyuridine          | < 0.10                      |
| Uracil                           | < 0.10                      |
| Cytosine                         | < 0.10                      |
| Thymine                          | < 0.10                      |
| 5-fluoro-1, 3-dimethylpyrimidine | < 0.10                      |

## References

1. J. Ciccolini, C. Mercier, M. F. Blachon, R. Favre, A. Durand, B. Lacarelle, *J. Clin. Pharm. Ther.*, 2004, **29**, 307-315.
2. L. W. Anderson, R. J. Parker, J. M. Collins, J. D. Ahlgren, D. Wilkinson, J. M. Strong, *J. Chromatogr. B*, 1992, **581**, 195-201.
3. J.-U. Mullot, S. Karolak, A. Fontova, B. Huart, Y. Levi, *Anal. Bioanal. Chem.*, 2009, **394**, 2203-2212.
4. S.D. Bukkitgar, N.P. Shetti, *Mat. Sci. Eng. C-Mater.*, 2016, **65**, 262-268.
5. J. Wang, X. Qu, L. Zhao, B. Yan, *Anal. Chem.*, 2021, **93**, 4308-4316.
